# Supplementary material for: Comparative transcriptome analysis of two contrasting watermelon genotypes during fruit development and ripening
Source: BMC Genomics. 2017 Jan 3;18:3. doi: 10.1186/s12864-016-3442-3 (PMC5209866; doi:10.1186/s12864-016-3442-3)
Supplement: Additional file 8: — Excel file containing the TF annotations. (XLSX 33 kb) [file 12864_2016_3442_MOESM8_ESM.xlsx]

## Sheet: TF annotiaon in COS
Additional file 8. Excel file containing the TF annotations
#TF annotiaon in COS
Sequence_Acc	Family	Family_type	Domains
Cla014051	AP2-EREBP	transcription factor	IPR001471
Cla020969	AP2-EREBP	transcription factor	IPR001471
Cla021070	AP2-EREBP	transcription factor	IPR001471
Cla021525	AP2-EREBP	transcription factor	IPR001471
Cla006212	AP2-EREBP	transcription factor	IPR001471
Cla007467	AP2-EREBP	transcription factor	IPR001471
Cla004120	AP2-EREBP	transcription factor	IPR001471
Cla018759	AP2-EREBP	transcription factor	IPR001471
Cla018834	AP2-EREBP	transcription factor	IPR001471
Cla018834	AP2-EREBP	transcription factor	IPR001471
Cla004912	AP2-EREBP	transcription factor	IPR001471
Cla012656	AP2-EREBP	transcription factor	IPR001471
Cla010713	AP2-EREBP	transcription factor	IPR001471
Cla012580	AP2-EREBP	transcription factor	IPR001471
Cla012465	AP2-EREBP	transcription factor	IPR001471
Cla003789	AP2-EREBP	transcription factor	IPR001471
Cla022354	AP2-EREBP	transcription factor	IPR001471
Cla022648	AP2-EREBP	transcription factor	IPR001471
Cla008472	AP2-EREBP	transcription factor	IPR001471
Cla015515	AP2-EREBP	transcription factor	IPR001471
Cla003267	AP2-EREBP	transcription factor	IPR001471
Cla014156	AP2-EREBP	transcription factor	IPR001471
Cla002922	AP2-EREBP	transcription factor	IPR001471
Cla002922	AP2-EREBP	transcription factor	IPR001471
Cla017720	AP2-EREBP	transcription factor	IPR001471
Cla023135	AP2-EREBP	transcription factor	IPR001471
Cla023361	AP2-EREBP	transcription factor	IPR001471
Cla011487	AP2-EREBP	transcription factor	IPR001471
Cla011488	AP2-EREBP	transcription factor	IPR001471
Cla016785	AP2-EREBP	transcription factor	IPR001471
Cla023158	AP2-EREBP	transcription factor	IPR001471
Cla002330	AP2-EREBP	transcription factor	IPR001471
Cla020244	AP2-EREBP	transcription factor	IPR001471
Cla016009	AP2-EREBP	transcription factor	IPR001471
Cla013424	AP2-EREBP	transcription factor	IPR001471
Cla019699	AP2-EREBP	transcription factor	IPR001471
Cla000701	AP2-EREBP	transcription factor	IPR001471
Cla021765	AP2-EREBP	transcription factor	IPR001471
Cla012819	ARF	transcription factor	IPR003340,IPR010525,IPR011525
Cla013766	ARF	transcription factor	IPR003340,IPR010525,IPR011525
Cla011357	ARF	transcription factor	IPR003340,IPR010525,IPR011525
Cla018293	ARF	transcription factor	IPR003340,IPR010525,IPR011525
Cla020609	AS2-LOB	transcription factor	IPR004883
Cla006956	AS2-LOB	transcription factor	IPR004883
Cla018976	AS2-LOB	transcription factor	IPR004883
Cla006955	AS2-LOB	transcription factor	IPR004883
Cla009805	AS2-LOB	transcription factor	IPR004883
Cla005993	AS2-LOB	transcription factor	IPR004883
Cla022679	AS2-LOB	transcription factor	IPR004883
Cla005507	AS2-LOB	transcription factor	IPR004883
Cla013469	AS2-LOB	transcription factor	IPR004883
Cla003924	B3-Domain	transcription factor	IPR003340
Cla001807	B3-Domain	transcription factor	IPR003340
Cla001807	B3-Domain	transcription factor	IPR003340
Cla011357	B3-Domain	transcription factor	IPR003340
Cla020188	B3-Domain	transcription factor	IPR003340
Cla019318	BED-type(Zn)	transcription factor/ chromatin remodeling	IPR003656
Cla003573	BED-type(Zn)	transcription factor/ chromatin remodeling	IPR003656
Cla006541	BED-type(Zn)	transcription factor/ chromatin remodeling	IPR003656,IPR012337
XLOC_001018	BED-type(Zn)	transcription factor/ chromatin remodeling	IPR003656,IPR012337
Cla022512	BES/BZR	transcription factor	IPR008540
Cla019641	BES/BZR	transcription factor	IPR008540
Cla014107	bHLH	transcription factor	IPR011598
Cla020364	bHLH	transcription factor	IPR011598
Cla009965	bHLH	transcription factor	IPR011598
Cla007559	bHLH	transcription factor	IPR011598
Cla018968	bHLH	transcription factor	IPR011598
Cla018860	bHLH	transcription factor	IPR011598
Cla012633	bHLH	transcription factor	IPR011598
Cla002749	bHLH	transcription factor	IPR011598
Cla002264	bHLH	transcription factor	IPR011598
XLOC_002308	bHLH	transcription factor	IPR011598
Cla010890	bHLH	transcription factor	IPR011598
Cla021901	bHLH	transcription factor	IPR011598
Cla022160	bHLH	transcription factor	IPR011598
Cla022177	bHLH	transcription factor	IPR011598
Cla022588	bHLH	transcription factor	IPR011598
Cla015223	bHLH	transcription factor	IPR011598
Cla005872	bHLH	transcription factor	IPR011598
Cla014822	bHLH	transcription factor	IPR011598
Cla010338	bHLH	transcription factor	IPR011598
Cla015153	bHLH	transcription factor	IPR011598
Cla014905	bHLH	transcription factor	IPR011598
Cla016224	bHLH	transcription factor	IPR011598
Cla008880	bHLH	transcription factor	IPR011598
Cla008890	bHLH	transcription factor	IPR011598
Cla017347	bHLH	transcription factor	IPR011598
Cla003821	bHLH	transcription factor	IPR011598
Cla000121	bHLH	transcription factor	IPR011598
Cla017143	bHLH	transcription factor	IPR011598
Cla017925	bHLH	transcription factor	IPR011598
Cla006599	bHLH	transcription factor	IPR011598
Cla006617	bHLH	transcription factor	IPR011598
Cla023083	bHLH	transcription factor	IPR011598
Cla022767	bHLH	transcription factor	IPR011598
Cla013532	bHLH	transcription factor	IPR011598
Cla020193	bHLH	transcription factor	IPR011598
Cla013612	bHLH	transcription factor	IPR011598
Cla002643	bHLH	transcription factor	IPR011598
Cla011292	bHLH	transcription factor	IPR011598
Cla000703	bHLH	transcription factor	IPR011598
Cla021148	bHLH	transcription factor	IPR011598
Cla021529	bHLH	transcription factor	IPR011598
Cla021708	bHLH	transcription factor	IPR011598
Cla020334	bZIP	transcription factor	IPR004827,IPR011616,IPR011700
Cla014195	bZIP	transcription factor	IPR004827,IPR011616,IPR011700
Cla021871	bZIP	transcription factor	IPR004827,IPR011616,IPR011700
Cla000910	bZIP	transcription factor	IPR004827
Cla014572	bZIP	transcription factor	IPR004827,IPR011616,IPR011700
Cla007950	bZIP	transcription factor	IPR004827,IPR011616,IPR011700
Cla022643	bZIP	transcription factor	IPR004827,IPR011616,IPR011700
Cla022235	bZIP	transcription factor	IPR004827,IPR011616,IPR011700
Cla023348	bZIP	transcription factor	IPR004827,IPR011616,IPR011700
Cla023484	bZIP	transcription factor	IPR004827,IPR011616,IPR011700
Cla019809	bZIP	transcription factor	IPR004827,IPR011616,IPR011700
Cla013418	bZIP	transcription factor	IPR004827,IPR011616,IPR011700
Cla005879	bZIP	transcription factor	IPR004827,IPR011616,IPR011700
Cla015627	bZIP	transcription factor	IPR004827,IPR011616,IPR011700
Cla015874	bZIP	transcription factor	IPR004827,IPR011616,IPR011700
Cla016019	bZIP	transcription factor	IPR004827,IPR011616,IPR011700
Cla011294	bZIP	transcription factor	IPR004827,IPR011616,IPR011700
Cla014048	bZIP	transcription factor	IPR004827,IPR011616,IPR011700
Cla004250	C2C2-CO-like	transcription factor	IPR010402
Cla000304	C2C2-CO-like	transcription factor	IPR001789,IPR010402
Cla007617	C2C2-CO-like	transcription factor	IPR010402
Cla008004	C2C2-CO-like	transcription factor	IPR000315,IPR010402
Cla004898	C2C2-CO-like	transcription factor	IPR010402
Cla022781	C2C2-CO-like	transcription factor	IPR010402
Cla010504	C2C2-CO-like	transcription factor	IPR000315,IPR010402
Cla006880	C2C2-CO-like	transcription factor	IPR010402
Cla010192	C2C2-Dof	transcription factor	IPR003851
Cla022532	C2C2-Dof	transcription factor	IPR003851
Cla002907	C2C2-Dof	transcription factor	IPR003851
Cla000540	C2C2-Dof	transcription factor	IPR003851
Cla000975	C2C2-Dof	transcription factor	IPR003851
Cla001812	C2C2-Dof	transcription factor	IPR003851
Cla021436	C2C2-GATA	transcription factor	IPR000679
Cla009267	C2C2-GATA	transcription factor	IPR000679,IPR013088
Cla012658	C2C2-GATA	transcription factor	IPR000679,IPR013088,IPR016679
Cla013765	C2C2-GATA	transcription factor	IPR000679,IPR013088
Cla015117	C2C2-GATA	transcription factor	IPR000679,IPR013088
Cla002811	C2C2-GATA	transcription factor	IPR000679,IPR013088
Cla000891	C2C2-GATA	transcription factor	IPR000679,IPR013088,IPR016679
Cla005600	C2C2-GATA	transcription factor	IPR000679,IPR013088
Cla005600	C2C2-GATA	transcription factor	IPR000679,IPR013088
Cla008610	C2C2-YABBY	transcription factor	IPR006780,IPR009071
Cla020937	C2H2	transcription factor	IPR001841,IPR013083
Cla010230	C2H2	transcription factor	IPR003656,IPR007087,IPR013087,IPR015880
Cla010016	C2H2	transcription factor	IPR001841
Cla009943	C2H2	transcription factor	IPR001841,IPR013083
Cla014172	C2H2	transcription factor	IPR001841,IPR013083,IPR018957
Cla021260	C2H2	transcription factor	IPR001841,IPR013083,IPR018957
Cla007393	C2H2	transcription factor	IPR007087
Cla007070	C2H2	transcription factor	IPR001841,IPR013083
Cla009610	C2H2	transcription factor	IPR001841,IPR013083,IPR017907,IPR018957
Cla019237	C2H2	transcription factor	IPR001841
Cla009339	C2H2	transcription factor	IPR001841,IPR013083
Cla009907	C2H2	transcription factor	IPR001841,IPR013083
Cla002277	C2H2	transcription factor	IPR001841,IPR013083,IPR017907,IPR018957
Cla002286	C2H2	transcription factor	IPR001841,IPR013083,IPR018957
Cla003999	C2H2	transcription factor	IPR001841,IPR013083,IPR018957
Cla004026	C2H2	transcription factor	IPR007087,IPR015880
Cla012633	C2H2	transcription factor	IPR007087
Cla004970	C2H2	transcription factor	IPR001841,IPR018957
Cla010908	C2H2	transcription factor	IPR001841,IPR013083,IPR018957
Cla005932	C2H2	transcription factor	IPR001841
Cla004365	C2H2	transcription factor	IPR001841,IPR013083,IPR018957
Cla012754	C2H2	transcription factor	IPR007087,IPR015880
Cla010767	C2H2	transcription factor	IPR015880
Cla012389	C2H2	transcription factor	IPR001841,IPR013083,IPR018957
Cla022520	C2H2	transcription factor	IPR001841,IPR013083,IPR017907,IPR018957
Cla002860	C2H2	transcription factor	IPR001841,IPR013083,IPR017907
Cla003899	C2H2	transcription factor	IPR001841,IPR013083,IPR018957
Cla013707	C2H2	transcription factor	IPR001841,IPR013083
Cla014795	C2H2	transcription factor	IPR007087,IPR013087,IPR015880
Cla016225	C2H2	transcription factor	IPR001841,IPR013083,IPR018957
Cla016129	C2H2	transcription factor	IPR001841
Cla012972	C2H2	transcription factor	IPR001841,IPR013083
Cla008454	C2H2	transcription factor	IPR001841,IPR013083,IPR018957
Cla015576	C2H2	transcription factor	IPR007087,IPR015880
Cla015236	C2H2	transcription factor	IPR001841,IPR013083,IPR018957
Cla015120	C2H2	transcription factor	IPR007087,IPR013087,IPR015880
Cla010285	C2H2	transcription factor	IPR001841
Cla010291	C2H2	transcription factor	IPR001841,IPR013083,IPR018957
Cla014126	C2H2	transcription factor	IPR001841,IPR013083,IPR018957
Cla014196	C2H2	transcription factor	IPR007087,IPR015880
Cla000805	C2H2	transcription factor	IPR001841
XLOC_003502	C2H2	transcription factor	IPR001841,IPR013083,IPR018957
Cla017383	C2H2	transcription factor	IPR001841,IPR013083
Cla017552	C2H2	transcription factor	IPR001841,IPR013083,IPR017907,IPR018957
Cla017823	C2H2	transcription factor	IPR001841,IPR013083
Cla017892	C2H2	transcription factor	IPR001841,IPR002110,IPR013083
Cla005625	C2H2	transcription factor	IPR001841,IPR001878
Cla017137	C2H2	transcription factor	IPR001841,IPR013083
Cla017429	C2H2	transcription factor	IPR007087,IPR015880
Cla017782	C2H2	transcription factor	IPR007087,IPR015880
Cla011427	C2H2	transcription factor	IPR001841,IPR013083,IPR018957
Cla022863	C2H2	transcription factor	IPR001841,IPR017907
Cla022983	C2H2	transcription factor	IPR001841,IPR013083
Cla023350	C2H2	transcription factor	IPR001841,IPR013083
Cla016598	C2H2	transcription factor	IPR001841,IPR013083
Cla015802	C2H2	transcription factor	IPR007087
Cla013320	C2H2	transcription factor	IPR001841,IPR013083,IPR018957
Cla008697	C2H2	transcription factor	IPR003656,IPR007087,IPR015880
Cla007793	C2H2	transcription factor	IPR001841,IPR013083,IPR018957
Cla015825	C2H2	transcription factor	IPR001841
Cla006876	C2H2	transcription factor	IPR001841,IPR013083,IPR018957
Cla008414	C2H2	transcription factor	IPR001841,IPR013083
Cla013565	C2H2	transcription factor	IPR001841,IPR013083,IPR017907,IPR018957
Cla013282	C2H2	transcription factor	IPR007087,IPR015880
Cla008547	C2H2	transcription factor	IPR007087
Cla008169	C2H2	transcription factor	IPR001841,IPR013083,IPR017907,IPR018957
Cla008216	C2H2	transcription factor	IPR007087,IPR013087,IPR015880
Cla019768	C2H2	transcription factor	IPR001841
Cla005227	C2H2	transcription factor	IPR007087,IPR013087,IPR015880
Cla000181	C2H2	transcription factor	IPR007087,IPR013087,IPR015880
Cla019501	C2H2	transcription factor	IPR001841,IPR013083,IPR017907,IPR018957
Cla019631	C2H2	transcription factor	IPR001680,IPR001841,IPR013083,IPR015943,IPR017986,IPR018957
Cla011090	C2H2	transcription factor	IPR001841,IPR013083,IPR018957
Cla009094	C2H2	transcription factor	IPR001841,IPR013083,IPR018957
Cla009135	C2H2	transcription factor	IPR007087
Cla000996	C2H2	transcription factor	IPR001841
Cla013107	C2H2	transcription factor	IPR007087,IPR015880
Cla002235	C3H	transcription factor	IPR000571
Cla004354	C3H	transcription factor	IPR000571,IPR002110
Cla022659	C3H	transcription factor	IPR000571
Cla009090	C3H	transcription factor	IPR000571
Cla005355	C3H	transcription factor	IPR000571
Cla011237	C3H	transcription factor	IPR000571
Cla016350	DDT	transcription factor & chromatin remodeling	IPR004022,IPR018500,IPR018501
Cla003897	GARP-G2-like	transcription factor	IPR001005,IPR001789,IPR006447,IPR009057
Cla016148	GARP-G2-like	transcription factor	IPR001005,IPR001789,IPR006447,IPR009057,IPR017930
Cla008778	GARP-G2-like	transcription factor	IPR001005,IPR001356,IPR001789,IPR006447,IPR009057,IPR017930
XLOC_021666	GeBP	transcription factor	IPR007592
Cla014205	GRAS	transcription factor	IPR005202
Cla014396	GRAS	transcription factor	IPR005202
Cla005438	GRAS	transcription factor	IPR005202
Cla013954	GRAS	transcription factor	IPR005202
Cla015143	GRAS	transcription factor	IPR005202
Cla015142	GRAS	transcription factor	IPR005202
Cla014025	GRAS	transcription factor	IPR005202
Cla020203	GRAS	transcription factor	IPR005202
Cla012151	GRAS	transcription factor	IPR005202
Cla013228	GRAS	transcription factor	IPR005202,IPR021914
Cla015244	Hap2/NF-YA	transcription factor	IPR001289,IPR018362
Cla016848	Hap2/NF-YA	transcription factor	IPR001289,IPR001841,IPR001965,IPR011011,IPR013083,IPR018362,IPR019786,IPR019787
Cla007198	Hap3/NF-YB	transcription factor	IPR009072
Cla007205	Hap3/NF-YB	transcription factor	IPR009072
Cla014719	Hap3/NF-YB	transcription factor	IPR009072
Cla014719	Hap3/NF-YB	transcription factor	IPR009072
Cla001860	Hap3/NF-YB	transcription factor	IPR009072
Cla001860	Hap3/NF-YB	transcription factor	IPR009072
Cla000915	Hap3/NF-YB	transcription factor	IPR003956,IPR003958,IPR009072
Cla013292	Hap3/NF-YB	transcription factor	IPR009072
Cla013291	Hap3/NF-YB	transcription factor	IPR009072
Cla013289	Hap3/NF-YB	transcription factor	IPR009072
Cla005035	Hap3/NF-YB	transcription factor	IPR009072
Cla006925	HD-SAD	transcription factor & lipid binding	IPR001356,IPR002913,IPR009057
Cla023107	HD-SAD	transcription factor & lipid binding	IPR001356,IPR002913,IPR004827,IPR009057
Cla010488	HD-SAD	transcription factor & lipid binding	IPR001356,IPR002913,IPR009057
Cla019523	HD-SAD	transcription factor & lipid binding	IPR001356,IPR002913,IPR004827,IPR009057
Cla010184	HD-ZIP	transcription factor	IPR001356,IPR006455,IPR006456,IPR009057
Cla005620	HD-ZIP	transcription factor	IPR001356,IPR006712,IPR009057
Cla021107	HD-ZIP	transcription factor	IPR006712
Cla011424	Homeodomain-TALE-BEL	transcription factor	IPR001356,IPR006563,IPR008422,IPR009057
Cla016590	Homeodomain-TALE-BEL	transcription factor	IPR001356,IPR006563,IPR008422,IPR009057
Cla008573	Homeodomain-TALE-KNOX	transcription factor	IPR001356,IPR008422,IPR009057
Cla015626	Homeodomain-TALE-KNOX	transcription factor	IPR001356,IPR005540,IPR005541,IPR008422,IPR009057
Cla000812	Homeodomain-TALE-KNOX	transcription factor	IPR001356,IPR005540,IPR005541,IPR008422,IPR009057
Cla010169	Homobox-WOX	transcription factor	IPR001356,IPR009057
Cla006925	Homobox-WOX	transcription factor	IPR001356,IPR002913,IPR009057
Cla011424	Homobox-WOX	transcription factor	IPR001356,IPR006563,IPR008422,IPR009057
Cla022590	Homobox-WOX	transcription factor	IPR001356,IPR009057
Cla010341	Homobox-WOX	transcription factor	IPR001356,IPR009057
Cla017553	Homobox-WOX	transcription factor	IPR001356,IPR009057
Cla008940	Homobox-WOX	transcription factor	IPR001356,IPR009057
Cla023107	Homobox-WOX	transcription factor	IPR001356,IPR002913,IPR004827,IPR009057
Cla016590	Homobox-WOX	transcription factor	IPR001356,IPR006563,IPR008422,IPR009057
Cla008573	Homobox-WOX	transcription factor	IPR001356,IPR008422,IPR009057
Cla015626	Homobox-WOX	transcription factor	IPR001356,IPR005540,IPR005541,IPR008422,IPR009057
Cla010488	Homobox-WOX	transcription factor	IPR001356,IPR002913,IPR009057
Cla008339	Homobox-WOX	transcription factor	IPR001356,IPR009057
Cla019523	Homobox-WOX	transcription factor	IPR001356,IPR002913,IPR004827,IPR009057
Cla021107	Homobox-WOX	transcription factor	IPR001356,IPR009057
Cla021121	Homobox-WOX	transcription factor	IPR001356,IPR009057
Cla000812	Homobox-WOX	transcription factor	IPR001356,IPR005540,IPR005541,IPR008422,IPR009057
Cla020657	HSF-type-DNA-binding	transcription factor	IPR000232
Cla000713	HSF-type-DNA-binding	transcription factor	IPR000232
Cla014857	JmjC	transcription factor & chromatin remodeling &Metalloenzymes	IPR003347,IPR003349,IPR004198
Cla014857	JmjN	transcription factor & chromatin remodeling	IPR003347,IPR003349,IPR004198
Cla014857	JUMONJI	transcription factor & chromatin remodeling	IPR003347,IPR003349,IPR004198
Cla012514	MADS-MIKC	transcription factor	IPR002100,IPR002487
Cla018544	MADS-MIKC	transcription factor	IPR002100,IPR002487
Cla017611	MADS-type1	transcription factor	IPR002100
Cla001480	MYB	transcription factor	IPR001005,IPR017877
Cla019268	MYB	transcription factor	IPR001005,IPR017877
Cla017995	MYB	transcription factor	IPR001005,IPR017877
Cla018099	MYB	transcription factor	IPR001005,IPR017877
Cla004328	MYB/SANT	transcription factor	IPR001005,IPR009057,IPR017884
Cla015919	MYB/SANT	transcription factor	IPR001005,IPR009057,IPR017884
Cla015933	MYB/SANT	transcription factor	IPR001005,IPR009057,IPR017884
Cla021730	MYB/SANT	transcription factor	IPR009057,IPR017884
Cla020769	MYB-HB-like	transcription factor	IPR001005,IPR009057
Cla010167	MYB-HB-like	transcription factor	IPR001005,IPR009057,IPR015495
Cla006184	MYB-HB-like	transcription factor	IPR001005,IPR009057,IPR015495,IPR017877
Cla020702	MYB-HB-like	transcription factor	IPR001005,IPR009057,IPR015495,IPR017930
Cla010130	MYB-HB-like	transcription factor	IPR001005,IPR001878,IPR006447,IPR009057,IPR017930
Cla009263	MYB-HB-like	transcription factor	IPR001005,IPR009057,IPR015495,IPR017930
Cla019223	MYB-HB-like	transcription factor	IPR001005,IPR009057,IPR015495,IPR017930
Cla019115	MYB-HB-like	transcription factor	IPR001005,IPR009057,IPR015495,IPR017930
Cla004328	MYB-HB-like	transcription factor	IPR001005,IPR006447,IPR009057,IPR017930
Cla004328	MYB-HB-like	transcription factor	IPR001005,IPR009057,IPR017884
Cla012581	MYB-HB-like	transcription factor	IPR001005,IPR009057,IPR015495,IPR017930
Cla012519	MYB-HB-like	transcription factor	IPR001005,IPR009057,IPR015495,IPR017930
Cla007979	MYB-HB-like	transcription factor	IPR001005,IPR001356,IPR006447,IPR009057,IPR017930
Cla013668	MYB-HB-like	transcription factor	IPR001005,IPR009057,IPR015495,IPR017930
Cla015165	MYB-HB-like	transcription factor	IPR001005,IPR009057,IPR015495,IPR017930
Cla008320	MYB-HB-like	transcription factor	IPR001005,IPR006447,IPR009057,IPR017930
Cla010316	MYB-HB-like	transcription factor	IPR001005,IPR009057,IPR015495,IPR017877
Cla003441	MYB-HB-like	transcription factor	IPR001005,IPR009057,IPR015495,IPR017930
Cla009130	MYB-HB-like	transcription factor	IPR001005,IPR006447,IPR009057,IPR017930
Cla009156	MYB-HB-like	transcription factor	IPR001005,IPR009057,IPR015495,IPR017930
Cla014029	MYB-HB-like	transcription factor	IPR001005,IPR006447,IPR009057,IPR017930
Cla005622	MYB-HB-like	transcription factor	IPR001005,IPR001878,IPR006447,IPR009057,IPR017930
Cla017100	MYB-HB-like	transcription factor	IPR001005,IPR009057,IPR015495,IPR017930
Cla004941	MYB-HB-like	transcription factor	IPR001005,IPR006447,IPR009057,IPR017930
Cla007716	MYB-HB-like	transcription factor	IPR001005,IPR009057,IPR015495,IPR017930
Cla015915	MYB-HB-like	transcription factor	IPR001005,IPR009057,IPR017877
Cla015991	MYB-HB-like	transcription factor	IPR001005,IPR001356,IPR006447,IPR009057,IPR017930
Cla006761	MYB-HB-like	transcription factor	IPR001005,IPR009057,IPR015495
Cla013461	MYB-HB-like	transcription factor	IPR001005,IPR009057,IPR015495,IPR017930
Cla013280	MYB-HB-like	transcription factor	IPR001005,IPR009057,IPR015495,IPR017877,IPR017930
Cla007790	MYB-HB-like	transcription factor	IPR001005,IPR009057
Cla007846	MYB-HB-like	transcription factor	IPR001005,IPR009057,IPR015495,IPR017930
Cla015919	MYB-HB-like	transcription factor	IPR001005,IPR009057,IPR017884
Cla015920	MYB-HB-like	transcription factor	IPR001005,IPR009057,IPR017877
Cla015933	MYB-HB-like	transcription factor	IPR001005,IPR009057,IPR017884
Cla019999	MYB-HB-like	transcription factor	IPR001005,IPR009057,IPR015495,IPR017930
Cla019999	MYB-HB-like	transcription factor	IPR001005,IPR009057,IPR015495,IPR017877,IPR017930
Cla013322	MYB-HB-like	transcription factor	IPR001005,IPR006447,IPR009057,IPR017930
Cla008221	MYB-HB-like	transcription factor	IPR001005,IPR001356,IPR006447,IPR009057,IPR017930
Cla021212	MYB-HB-like	transcription factor	IPR001005,IPR006447,IPR009057,IPR017930
Cla006268	NAM	transcription factor	IPR003441
Cla020366	NAM	transcription factor	IPR003441
Cla019099	NAM	transcription factor	IPR003441
Cla019099	NAM	transcription factor	IPR003441
Cla019099	NAM	transcription factor	IPR003441
Cla011760	NAM	transcription factor	IPR003441
Cla013731	NAM	transcription factor	IPR003441
Cla000378	NAM	transcription factor	IPR003441
Cla004625	NAM	transcription factor	IPR003441
Cla023407	NAM	transcription factor	IPR003441
Cla011554	NAM	transcription factor	IPR003441
Cla008633	NAM	transcription factor	IPR003441
Cla008629	NAM	transcription factor	IPR003441
XLOC_009067	NAM	transcription factor	IPR003441
Cla006906	NAM	transcription factor	IPR003441
Cla011058	NAM	transcription factor	IPR003441
Cla019693	NAM	transcription factor	IPR003441
Cla019693	NAM	transcription factor	IPR003441
Cla011315	NAM	transcription factor	IPR003441
Cla012144	NAM	transcription factor	IPR003441
Cla018596	NAM	transcription factor	IPR003441
Cla002170	NAM	transcription factor	IPR003441
Cla020368	RAV	transcription factor	IPR001471,IPR003340
Cla018724	RAV	transcription factor	IPR001471,IPR003340
Cla000855	RAV	transcription factor	IPR001471,IPR003340
Cla004090	SBP	transcription factor	IPR004333
Cla004090	SBP	transcription factor	IPR004333
Cla001519	SBP	transcription factor	IPR004333
Cla006667	SBP	transcription factor	IPR004333
Cla019041	SBP	transcription factor	IPR004333
Cla017529	SBP	transcription factor	IPR004333
Cla002630	SBP	transcription factor	IPR004333
Cla002630	SBP	transcription factor	IPR004333
Cla018546	SBP	transcription factor	IPR004333
Cla009785	TCP	transcription factor	IPR005333,IPR017887
Cla009096	TCP	transcription factor	IPR005333,IPR017887
Cla001487	TIFY	transcription factor	IPR010399
Cla009781	TIFY	transcription factor	IPR010399
Cla012536	TIFY	transcription factor	IPR010399
Cla019575	TIFY	transcription factor	IPR010399
Cla011143	TIFY	transcription factor	IPR010399
Cla018445	TIFY	transcription factor	IPR010399
Cla020778	TUBBY	transcription factor	IPR000007
Cla009333	TUBBY	transcription factor	IPR000007
Cla014216	TUBBY	transcription factor	IPR000007
Cla021750	WD40-like	transcription factor	IPR001680,IPR015943,IPR017986,IPR019775
Cla010012	WD40-like	transcription factor	IPR001680,IPR015943,IPR017986,IPR019775
Cla010606	WD40-like	transcription factor	IPR001680,IPR015943,IPR017986
Cla018903	WD40-like	transcription factor	IPR015943
Cla004956	WD40-like	transcription factor	IPR001680,IPR015943,IPR017986,IPR019775
Cla006020	WD40-like	transcription factor	IPR001680,IPR015943,IPR017986
Cla012663	WD40-like	transcription factor	IPR001680,IPR015943,IPR017986
Cla021939	WD40-like	transcription factor	IPR000210,IPR011333,IPR015943,IPR017986
Cla022082	WD40-like	transcription factor	IPR001680,IPR015943,IPR017986,IPR019775
Cla022529	WD40-like	transcription factor	IPR001680,IPR015943,IPR017986,IPR019775
Cla003621	WD40-like	transcription factor	IPR001680,IPR015943,IPR017986
Cla013914	WD40-like	transcription factor	IPR015943,IPR017986
Cla013810	WD40-like	transcription factor	IPR001680,IPR015943,IPR017986
Cla005884	WD40-like	transcription factor	IPR015943
Cla016317	WD40-like	transcription factor	IPR001680,IPR015943,IPR017986,IPR019775
Cla015187	WD40-like	transcription factor	IPR015943,IPR017986
Cla008942	WD40-like	transcription factor	IPR001680,IPR015943,IPR017986
Cla017359	WD40-like	transcription factor	IPR015943
Cla017326	WD40-like	transcription factor	IPR001680,IPR015943,IPR017986,IPR019775
Cla002889	WD40-like	transcription factor	IPR015943
Cla017707	WD40-like	transcription factor	IPR001680,IPR015943,IPR017986
Cla004882	WD40-like	transcription factor	IPR001680,IPR017986,IPR019775
Cla017422	WD40-like	transcription factor	IPR001680,IPR015943,IPR017986
Cla015803	WD40-like	transcription factor	IPR001680,IPR015943,IPR017986
Cla010432	WD40-like	transcription factor	IPR015943
Cla006288	WD40-like	transcription factor	IPR015943,IPR017986
Cla011254	WD40-like	transcription factor	IPR001245,IPR001680,IPR017986
Cla019631	WD40-like	transcription factor	IPR001680,IPR001841,IPR013083,IPR015943,IPR017986,IPR018957
Cla002084	WRKY	transcription factor	IPR003657
Cla021021	WRKY	transcription factor	IPR003657
Cla006015	WRKY	transcription factor	IPR003657
Cla007307	WRKY	transcription factor	IPR003657
Cla015154	WRKY	transcription factor	IPR003657
Cla015003	WRKY	transcription factor	IPR003657
Cla013967	WRKY	transcription factor	IPR003657
Cla017213	WRKY	transcription factor	IPR003657
Cla018059	WRKY	transcription factor	IPR003657
Cla016540	WRKY	transcription factor	IPR003657
Cla008480	WRKY	transcription factor	IPR003657
Cla021170	WRKY	transcription factor	IPR003657
Cla021806	WRKY	transcription factor	IPR003657
Cla010184	ZF-HD	transcription factor	IPR001356,IPR006455,IPR006456,IPR009057
Cla010690	Znf-LSD	transcription factor	IPR005735
Cla016175	Znf-LSD	transcription factor	IPR005735

## Sheet: TF annotation in LSW177
Additional file 8. Excel file containing the TF annotations
#TF annotiaon in COS
Sequence_Acc	Family	Family_type	Domains
Cla020801	AP2-EREBP	transcription factor	IPR001471
Cla020392	AP2-EREBP	transcription factor	IPR001471
Cla009964	AP2-EREBP	transcription factor	IPR001471
Cla009964	AP2-EREBP	transcription factor	IPR001471
Cla009964	AP2-EREBP	transcription factor	IPR001471
Cla004120	AP2-EREBP	transcription factor	IPR001471
Cla018759	AP2-EREBP	transcription factor	IPR001471
Cla018834	AP2-EREBP	transcription factor	IPR001471
Cla018834	AP2-EREBP	transcription factor	IPR001471
Cla004912	AP2-EREBP	transcription factor	IPR001471
Cla007092	AP2-EREBP	transcription factor	IPR001471
Cla006719	AP2-EREBP	transcription factor	IPR001471
Cla012656	AP2-EREBP	transcription factor	IPR001471
Cla012580	AP2-EREBP	transcription factor	IPR001471
Cla022648	AP2-EREBP	transcription factor	IPR001471
Cla014156	AP2-EREBP	transcription factor	IPR001471
Cla009635	AP2-EREBP	transcription factor	IPR001471
Cla017389	AP2-EREBP	transcription factor	IPR001471
Cla002922	AP2-EREBP	transcription factor	IPR001471
Cla002922	AP2-EREBP	transcription factor	IPR001471
Cla017848	AP2-EREBP	transcription factor	IPR001471
Cla016785	AP2-EREBP	transcription factor	IPR001471
Cla006605	AP2-EREBP	transcription factor	IPR001471
Cla023158	AP2-EREBP	transcription factor	IPR001471
Cla003618	AP2-EREBP	transcription factor	IPR001471
Cla013573	AP2-EREBP	transcription factor	IPR001471
Cla014051	AP2-EREBP	transcription factor	IPR001471
Cla021188	AP2-EREBP	transcription factor	IPR001471
Cla021765	AP2-EREBP	transcription factor	IPR001471
Cla020969	AP2-EREBP	transcription factor	IPR001471
Cla006212	AP2-EREBP	transcription factor	IPR001471
Cla012819	ARF	transcription factor	IPR003340,IPR010525,IPR011525
Cla009652	ARF	transcription factor	IPR003340,IPR010525
Cla011357	ARF	transcription factor	IPR003340,IPR010525,IPR011525
Cla020609	AS2-LOB	transcription factor	IPR004883
Cla006956	AS2-LOB	transcription factor	IPR004883
Cla006955	AS2-LOB	transcription factor	IPR004883
Cla005507	AS2-LOB	transcription factor	IPR004883
Cla014015	AS2-LOB	transcription factor	IPR004883
Cla005052	AS2-LOB	transcription factor	IPR004883
Cla009182	AS2-LOB	transcription factor	IPR004883
Cla020398	AS2-LOB	transcription factor	IPR004883
Cla022557	B3-Domain	transcription factor	IPR003340
Cla022075	B3-Domain	transcription factor	IPR003340
Cla001807	B3-Domain	transcription factor	IPR003340
Cla001807	B3-Domain	transcription factor	IPR003340
Cla011357	B3-Domain	transcription factor	IPR003340
XLOC_008409	B3-Domain	transcription factor	IPR003340
Cla003573	BED-type(Zn)	transcription factor/ chromatin remodeling	IPR003656
Cla018194	BED-type(Zn)	transcription factor/ chromatin remodeling	IPR003656
Cla019641	BES/BZR	transcription factor	IPR008540
Cla009965	bHLH	transcription factor	IPR011598
Cla006693	bHLH	transcription factor	IPR011598
Cla018780	bHLH	transcription factor	IPR011598
Cla010576	bHLH	transcription factor	IPR011598
XLOC_002308	bHLH	transcription factor	IPR011598
Cla002749	bHLH	transcription factor	IPR011598
Cla006058	bHLH	transcription factor	IPR011598
Cla010890	bHLH	transcription factor	IPR011598
Cla021901	bHLH	transcription factor	IPR011598
Cla022160	bHLH	transcription factor	IPR011598
Cla022177	bHLH	transcription factor	IPR011598
Cla014822	bHLH	transcription factor	IPR011598
Cla010338	bHLH	transcription factor	IPR011598
Cla014905	bHLH	transcription factor	IPR011598
Cla016224	bHLH	transcription factor	IPR011598
Cla014085	bHLH	transcription factor	IPR011598
Cla014246	bHLH	transcription factor	IPR011598
Cla000218	bHLH	transcription factor	IPR011598
Cla008880	bHLH	transcription factor	IPR011598
Cla017347	bHLH	transcription factor	IPR011598
Cla017518	bHLH	transcription factor	IPR011598
Cla017143	bHLH	transcription factor	IPR011598
Cla017516	bHLH	transcription factor	IPR011598
Cla006599	bHLH	transcription factor	IPR011598
Cla006617	bHLH	transcription factor	IPR011598
Cla007867	bHLH	transcription factor	IPR011598
Cla016925	bHLH	transcription factor	IPR011598
Cla010507	bHLH	transcription factor	IPR011598
Cla019871	bHLH	transcription factor	IPR011598
Cla020193	bHLH	transcription factor	IPR011598
Cla013612	bHLH	transcription factor	IPR011598
Cla002643	bHLH	transcription factor	IPR011598
Cla005253	bHLH	transcription factor	IPR011598
Cla000703	bHLH	transcription factor	IPR011598
Cla021059	bHLH	transcription factor	IPR011598
Cla020795	bZIP	transcription factor	IPR004827,IPR011616,IPR011700
Cla020474	bZIP	transcription factor	IPR004827
Cla009958	bZIP	transcription factor	IPR004827,IPR011616,IPR011700
Cla014572	bZIP	transcription factor	IPR004827,IPR011616,IPR011700
Cla007293	bZIP	transcription factor	IPR004827,IPR011616,IPR011700
Cla007950	bZIP	transcription factor	IPR004827,IPR011616,IPR011700
Cla017444	bZIP	transcription factor	IPR004827,IPR011616,IPR011700
Cla016581	bZIP	transcription factor	IPR004827,IPR011616,IPR011700
Cla023348	bZIP	transcription factor	IPR004827,IPR011616,IPR011700
Cla007656	bZIP	transcription factor	IPR003657,IPR004827
Cla005879	bZIP	transcription factor	IPR004827,IPR011616,IPR011700
Cla015627	bZIP	transcription factor	IPR004827,IPR011616,IPR011700
Cla015874	bZIP	transcription factor	IPR004827,IPR011616,IPR011700
Cla011294	bZIP	transcription factor	IPR004827,IPR011616,IPR011700
Cla018535	bZIP	transcription factor	IPR004827,IPR011616,IPR011700
Cla020334	bZIP	transcription factor	IPR004827,IPR011616,IPR011700
Cla018797	C2C2-CO-like	transcription factor	IPR000315,IPR010402
Cla010793	C2C2-CO-like	transcription factor	IPR000315,IPR010402
Cla008004	C2C2-CO-like	transcription factor	IPR000315,IPR010402
Cla022378	C2C2-CO-like	transcription factor	IPR010402
Cla010504	C2C2-CO-like	transcription factor	IPR000315,IPR010402
Cla006880	C2C2-CO-like	transcription factor	IPR010402
Cla000304	C2C2-CO-like	transcription factor	IPR001789,IPR010402
Cla004250	C2C2-CO-like	transcription factor	IPR010402
Cla010192	C2C2-Dof	transcription factor	IPR003851
Cla004880	C2C2-Dof	transcription factor	IPR003851
Cla006705	C2C2-Dof	transcription factor	IPR003851
Cla019107	C2C2-Dof	transcription factor	IPR003851
Cla022532	C2C2-Dof	transcription factor	IPR003851
Cla002907	C2C2-Dof	transcription factor	IPR003851
Cla000540	C2C2-Dof	transcription factor	IPR003851
Cla000975	C2C2-Dof	transcription factor	IPR003851
Cla019706	C2C2-Dof	transcription factor	IPR003851
Cla001812	C2C2-Dof	transcription factor	IPR003851
Cla018604	C2C2-Dof	transcription factor	IPR003851
Cla021140	C2C2-Dof	transcription factor	IPR003851
Cla013765	C2C2-GATA	transcription factor	IPR000679
Cla015117	C2C2-GATA	transcription factor	IPR000679,IPR013088
Cla015117	C2C2-GATA	transcription factor	IPR000679,IPR013088
Cla000891	C2C2-GATA	transcription factor	IPR000679,IPR013088,IPR016679
Cla005600	C2C2-GATA	transcription factor	IPR000679,IPR013088
Cla023109	C2C2-GATA	transcription factor	IPR000679,IPR013088
Cla021436	C2C2-GATA	transcription factor	IPR000679
Cla000807	C2C2-YABBY	transcription factor	IPR006780,IPR009071
Cla020873	C2H2	transcription factor	IPR007087,IPR015880
Cla009996	C2H2	transcription factor	IPR001841,IPR013083
Cla007070	C2H2	transcription factor	IPR001841,IPR013083
Cla007595	C2H2	transcription factor	IPR003656,IPR007087,IPR015880
Cla019187	C2H2	transcription factor	IPR001841,IPR013083,IPR018957
Cla019237	C2H2	transcription factor	IPR001841
Cla004970	C2H2	transcription factor	IPR001841,IPR013083,IPR018957
Cla009289	C2H2	transcription factor	IPR001841,IPR013083,IPR018957
Cla007588	C2H2	transcription factor	IPR001841,IPR002110,IPR013083
Cla018883	C2H2	transcription factor	IPR001841,IPR013083
Cla019093	C2H2	transcription factor	IPR001841,IPR013083,IPR017907,IPR018957
XLOC_018480	C2H2	transcription factor	IPR007087,IPR015880
Cla002286	C2H2	transcription factor	IPR001841,IPR013083,IPR018957
Cla005405	C2H2	transcription factor	IPR007087
Cla010908	C2H2	transcription factor	IPR001841,IPR018957
Cla005998	C2H2	transcription factor	IPR007087,IPR015880
Cla005463	C2H2	transcription factor	IPR001841,IPR013083,IPR018957
Cla022357	C2H2	transcription factor	IPR007087,IPR015880
Cla015235	C2H2	transcription factor	IPR007087,IPR015880
Cla014934	C2H2	transcription factor	IPR007087
Cla016225	C2H2	transcription factor	IPR001841,IPR013083,IPR018957
Cla016129	C2H2	transcription factor	IPR001841
Cla003328	C2H2	transcription factor	IPR001841,IPR018957
Cla005510	C2H2	transcription factor	IPR000315,IPR001841
Cla015576	C2H2	transcription factor	IPR007087,IPR013087,IPR015880
Cla000805	C2H2	transcription factor	IPR001841
Cla009667	C2H2	transcription factor	IPR001841,IPR013083,IPR018957
XLOC_003502	C2H2	transcription factor	IPR001841,IPR013083,IPR018957
Cla017383	C2H2	transcription factor	IPR001841
Cla017584	C2H2	transcription factor	IPR001841,IPR013083,IPR017907,IPR018957
Cla017892	C2H2	transcription factor	IPR001841,IPR002110,IPR013083
Cla017137	C2H2	transcription factor	IPR001841
Cla017782	C2H2	transcription factor	IPR007087,IPR015880
Cla011427	C2H2	transcription factor	IPR001841,IPR013083,IPR018957
Cla023156	C2H2	transcription factor	IPR001841,IPR013083,IPR018957
Cla023349	C2H2	transcription factor	IPR001841,IPR013083
Cla016933	C2H2	transcription factor	IPR001841,IPR013083,IPR017907
Cla022892	C2H2	transcription factor	IPR001841,IPR013083,IPR017907
Cla016598	C2H2	transcription factor	IPR001841
Cla015893	C2H2	transcription factor	IPR001841
Cla005819	C2H2	transcription factor	IPR007087,IPR013087,IPR015880
Cla020017	C2H2	transcription factor	IPR007087,IPR015880
Cla000546	C2H2	transcription factor	IPR001841,IPR012337,IPR013083,IPR017907
Cla008697	C2H2	transcription factor	IPR003656,IPR007087,IPR015880
Cla015825	C2H2	transcription factor	IPR001841
Cla001659	C2H2	transcription factor	IPR007087
Cla013565	C2H2	transcription factor	IPR001841,IPR013083,IPR017907,IPR018957
Cla013299	C2H2	transcription factor	IPR001841,IPR002110,IPR013083
Cla003135	C2H2	transcription factor	IPR001841
Cla003121	C2H2	transcription factor	IPR001841,IPR013083,IPR018957
Cla002675	C2H2	transcription factor	IPR007087,IPR013087,IPR015880
Cla011150	C2H2	transcription factor	IPR007087
Cla009094	C2H2	transcription factor	IPR001841,IPR013083,IPR018957
Cla005227	C2H2	transcription factor	IPR007087,IPR013087,IPR015880
Cla019501	C2H2	transcription factor	IPR001841,IPR013083,IPR017907,IPR018957
Cla011090	C2H2	transcription factor	IPR001841,IPR013083,IPR018957
Cla000996	C2H2	transcription factor	IPR001841
Cla018661	C2H2	transcription factor	IPR007087,IPR015880
Cla018326	C2H2	transcription factor	IPR007087,IPR015880
Cla018476	C2H2	transcription factor	IPR001841,IPR013083,IPR018957
Cla014172	C2H2	transcription factor	IPR001841,IPR013083,IPR018957
Cla001721	C2H2	transcription factor	IPR007087
Cla010119	C2H2	transcription factor	IPR007087,IPR013087,IPR015880
Cla010016	C2H2	transcription factor	IPR001841,IPR013083
Cla002235	C3H	transcription factor	IPR000571
Cla022659	C3H	transcription factor	IPR000571
Cla009090	C3H	transcription factor	IPR000571
Cla023197	C3H	transcription factor	IPR000571
Cla011852	C3H	transcription factor	IPR000571
Cla020897	C3H	transcription factor	IPR000571
Cla010787	DDT	transcription factor & chromatin remodeling	IPR018500,IPR018501
Cla022718	GARP-G2-like	transcription factor	IPR001005,IPR001789,IPR006447,IPR009057,IPR017053
Cla016148	GARP-G2-like	transcription factor	IPR001005,IPR001789,IPR006447,IPR009057,IPR017930
Cla020582	GRAS	transcription factor	IPR005202
Cla007022	GRAS	transcription factor	IPR005202
Cla014516	GRAS	transcription factor	IPR005202
Cla015143	GRAS	transcription factor	IPR005202
Cla001409	GRAS	transcription factor	IPR005202
Cla014205	GRAS	transcription factor	IPR005202
Cla013228	GRAS	transcription factor	IPR005202,IPR021914
Cla000827	Hap2/NF-YA	transcription factor	IPR001289,IPR018362
Cla006025	Hap3/NF-YB	transcription factor	IPR009072
Cla007198	Hap3/NF-YB	transcription factor	IPR009072
Cla007205	Hap3/NF-YB	transcription factor	IPR009072
Cla014719	Hap3/NF-YB	transcription factor	IPR009072
Cla014719	Hap3/NF-YB	transcription factor	IPR009072
Cla004399	Hap3/NF-YB	transcription factor	IPR003958,IPR009072
Cla019920	Hap3/NF-YB	transcription factor	IPR003958,IPR009072
Cla013292	Hap3/NF-YB	transcription factor	IPR009072
Cla013291	Hap3/NF-YB	transcription factor	IPR009072
Cla013289	Hap3/NF-YB	transcription factor	IPR009072
Cla013285	Hap3/NF-YB	transcription factor	IPR009072
Cla008527	Hap3/NF-YB	transcription factor	IPR009072
Cla005035	Hap3/NF-YB	transcription factor	IPR009072
Cla006287	Hap3/NF-YB	transcription factor	IPR009072
Cla012669	HD-SAD	transcription factor & lipid binding	IPR001356,IPR002913,IPR009057
Cla019400	HD-SAD	transcription factor & lipid binding	IPR001356,IPR002913,IPR009057
Cla019523	HD-SAD	transcription factor & lipid binding	IPR001356,IPR002913,IPR004827,IPR009057
Cla018652	HD-SAD	transcription factor & lipid binding	IPR001356,IPR002913,IPR009057
Cla001881	HD-ZIP	transcription factor	IPR001356,IPR006455,IPR006456,IPR009057
Cla011424	Homeodomain-TALE-BEL	transcription factor	IPR001356,IPR006563,IPR008422,IPR009057
Cla016590	Homeodomain-TALE-BEL	transcription factor	IPR001356,IPR006563,IPR008422,IPR009057
Cla019973	Homeodomain-TALE-KNOX	transcription factor	IPR001356,IPR005540,IPR005541,IPR008422,IPR009057
Cla015626	Homeodomain-TALE-KNOX	transcription factor	IPR001356,IPR005540,IPR005541,IPR008422,IPR009057
Cla011424	Homobox-WOX	transcription factor	IPR001356,IPR006563,IPR008422,IPR009057
Cla002419	Homobox-WOX	transcription factor	IPR001356,IPR009057
Cla012669	Homobox-WOX	transcription factor	IPR001356,IPR002913,IPR009057
Cla022590	Homobox-WOX	transcription factor	IPR001356,IPR009057
Cla010341	Homobox-WOX	transcription factor	IPR001356,IPR009057
Cla017553	Homobox-WOX	transcription factor	IPR001356,IPR009057
Cla016590	Homobox-WOX	transcription factor	IPR001356,IPR006563,IPR008422,IPR009057
Cla019973	Homobox-WOX	transcription factor	IPR001356,IPR005540,IPR005541,IPR008422,IPR009057
Cla015626	Homobox-WOX	transcription factor	IPR001356,IPR005540,IPR005541,IPR008422,IPR009057
Cla019400	Homobox-WOX	transcription factor	IPR001356,IPR002913,IPR009057
Cla019523	Homobox-WOX	transcription factor	IPR001356,IPR002913,IPR004827,IPR009057
Cla018652	Homobox-WOX	transcription factor	IPR001356,IPR002913,IPR009057
Cla021121	Homobox-WOX	transcription factor	IPR001356,IPR009057
Cla014193	Homobox-WOX	transcription factor	IPR001356,IPR009057
Cla010169	Homobox-WOX	transcription factor	IPR001356,IPR009057
Cla020657	HSF-type-DNA-binding	transcription factor	IPR000232
Cla016764	HSF-type-DNA-binding	transcription factor	IPR000232
Cla007345	HSF-type-DNA-binding	transcription factor	IPR000232
Cla000713	HSF-type-DNA-binding	transcription factor	IPR000232
Cla021592	HSF-type-DNA-binding	transcription factor	IPR000232
Cla021592	HSF-type-DNA-binding	transcription factor	IPR000232
Cla014857	JmjC	transcription factor & chromatin remodeling &Metalloenzymes	IPR003347,IPR003349,IPR004198
Cla016238	JmjC	transcription factor & chromatin remodeling &Metalloenzymes	IPR003347,IPR004198
Cla014857	JmjN	transcription factor & chromatin remodeling	IPR003347,IPR003349,IPR004198
Cla014857	JUMONJI	transcription factor & chromatin remodeling	IPR003347,IPR003349,IPR004198
Cla000691	MADS-MIKC	transcription factor	IPR002100,IPR002487
Cla009883	MADS-MIKC	transcription factor	IPR002100,IPR002487
XLOC_008690	MADS-MIKC	transcription factor	IPR002100,IPR002487
Cla017611	MADS-type1	transcription factor	IPR002100
Cla005142	MADS-type1	transcription factor	IPR002100
Cla017995	MYB	transcription factor	IPR001005,IPR017877
Cla018099	MYB	transcription factor	IPR001005,IPR017877
Cla004328	MYB/SANT	transcription factor	IPR001005,IPR009057,IPR017884
Cla015919	MYB/SANT	transcription factor	IPR001005,IPR009057,IPR017884
Cla013215	MYB-HB-like	transcription factor	IPR001005,IPR009057,IPR015495,IPR017930
Cla010130	MYB-HB-like	transcription factor	IPR001005,IPR001878,IPR006447,IPR009057,IPR017930
Cla009263	MYB-HB-like	transcription factor	IPR001005,IPR009057,IPR015495,IPR017930
Cla019223	MYB-HB-like	transcription factor	IPR001005,IPR009057,IPR015495,IPR017930
Cla006738	MYB-HB-like	transcription factor	IPR001005,IPR006447,IPR009057,IPR017930
Cla019115	MYB-HB-like	transcription factor	IPR001005,IPR009057,IPR015495,IPR017930
Cla004328	MYB-HB-like	transcription factor	IPR001005,IPR006447,IPR009057,IPR017930
Cla004328	MYB-HB-like	transcription factor	IPR001005,IPR009057,IPR017884
Cla012581	MYB-HB-like	transcription factor	IPR001005,IPR009057,IPR015495,IPR017930
Cla004003	MYB-HB-like	transcription factor	IPR001005,IPR009057,IPR017930
Cla012519	MYB-HB-like	transcription factor	IPR001005,IPR009057,IPR015495,IPR017930
Cla022488	MYB-HB-like	transcription factor	IPR001005,IPR009057,IPR017877
Cla022601	MYB-HB-like	transcription factor	IPR001005,IPR009057,IPR015495,IPR017930
Cla005481	MYB-HB-like	transcription factor	IPR001005,IPR006447,IPR009057
Cla009130	MYB-HB-like	transcription factor	IPR001005,IPR006447,IPR009057,IPR017930
Cla015165	MYB-HB-like	transcription factor	IPR001005,IPR009057,IPR015495
Cla010265	MYB-HB-like	transcription factor	IPR001005,IPR006447,IPR009057,IPR017930
Cla010413	MYB-HB-like	transcription factor	IPR001005,IPR009057,IPR015495,IPR017930
Cla014029	MYB-HB-like	transcription factor	IPR001005,IPR006447,IPR009057,IPR017930
Cla014441	MYB-HB-like	transcription factor	IPR001005,IPR006447,IPR009057,IPR017930
Cla004910	MYB-HB-like	transcription factor	IPR001005,IPR009057
Cla017100	MYB-HB-like	transcription factor	IPR001005,IPR009057,IPR015495,IPR017930
Cla004941	MYB-HB-like	transcription factor	IPR001005,IPR006447,IPR009057,IPR017930
Cla017441	MYB-HB-like	transcription factor	IPR001005,IPR006447,IPR009057,IPR017930
Cla017496	MYB-HB-like	transcription factor	IPR001005,IPR009057,IPR015495,IPR017930
Cla011345	MYB-HB-like	transcription factor	IPR001005,IPR009057,IPR015495,IPR017930
Cla017179	MYB-HB-like	transcription factor	IPR001005,IPR006447,IPR009057
Cla016980	MYB-HB-like	transcription factor	IPR001005,IPR009057,IPR015495,IPR017930
Cla016743	MYB-HB-like	transcription factor	IPR001005,IPR006447,IPR009057,IPR017930
Cla007815	MYB-HB-like	transcription factor	IPR001005,IPR009057,IPR015495,IPR017930
Cla015915	MYB-HB-like	transcription factor	IPR001005,IPR009057,IPR017877
Cla015991	MYB-HB-like	transcription factor	IPR001005,IPR001356,IPR006447,IPR009057,IPR017930
Cla006761	MYB-HB-like	transcription factor	IPR001005,IPR009057,IPR015495,IPR017930
Cla013280	MYB-HB-like	transcription factor	IPR001005,IPR009057,IPR015495,IPR017877,IPR017930
Cla015919	MYB-HB-like	transcription factor	IPR001005,IPR009057,IPR017884
Cla015920	MYB-HB-like	transcription factor	IPR001005,IPR009057
Cla019999	MYB-HB-like	transcription factor	IPR001005,IPR009057,IPR015495,IPR017930
Cla019999	MYB-HB-like	transcription factor	IPR001005,IPR009057,IPR015495,IPR017877,IPR017930
Cla008544	MYB-HB-like	transcription factor	IPR001005,IPR009057,IPR015495,IPR017930
Cla005135	MYB-HB-like	transcription factor	IPR001005,IPR009057,IPR015495,IPR017877
Cla005135	MYB-HB-like	transcription factor	IPR001005,IPR009057,IPR015495,IPR017930
Cla018631	MYB-HB-like	transcription factor	IPR001005,IPR006447,IPR009057,IPR017930
Cla013979	MYB-HB-like	transcription factor	IPR001005,IPR009057,IPR015495,IPR017930
Cla012155	MYB-HB-like	transcription factor	IPR001005,IPR009057,IPR015495,IPR017930
Cla021212	MYB-HB-like	transcription factor	IPR001005,IPR006447,IPR009057,IPR017930
Cla013099	MYB-HB-like	transcription factor	IPR001005,IPR009057,IPR015495,IPR017930
Cla020769	MYB-HB-like	transcription factor	IPR001005,IPR009057
Cla020633	MYB-HB-like	transcription factor	IPR001005,IPR009057,IPR015495,IPR017930
Cla021419	MYB-HB-like	transcription factor	IPR001005,IPR006447,IPR009057,IPR017930
Cla006697	NAM	transcription factor	IPR003441
Cla019099	NAM	transcription factor	IPR003441
Cla019099	NAM	transcription factor	IPR003441
Cla019099	NAM	transcription factor	IPR003441
Cla011760	NAM	transcription factor	IPR003441
Cla011761	NAM	transcription factor	IPR003441
Cla013731	NAM	transcription factor	IPR003441
Cla016169	NAM	transcription factor	IPR003441
Cla009439	NAM	transcription factor	IPR003441
Cla010317	NAM	transcription factor	IPR003441
Cla016990	NAM	transcription factor	IPR003441
Cla005677	NAM	transcription factor	IPR003441
Cla011554	NAM	transcription factor	IPR003441
Cla003347	NAM	transcription factor	IPR003441
Cla023182	NAM	transcription factor	IPR003441
Cla019693	NAM	transcription factor	IPR003441
Cla019693	NAM	transcription factor	IPR003441
Cla018596	NAM	transcription factor	IPR003441
Cla002170	NAM	transcription factor	IPR003441
Cla014269	NAM	transcription factor	IPR003441
Cla006268	NAM	transcription factor	IPR003441
Cla018724	RAV	transcription factor	IPR001471,IPR003340
Cla000855	RAV	transcription factor	IPR001471,IPR003340
Cla004090	SBP	transcription factor	IPR004333
Cla004090	SBP	transcription factor	IPR004333
Cla001519	SBP	transcription factor	IPR004333
Cla006667	SBP	transcription factor	IPR004333
Cla017529	SBP	transcription factor	IPR004333
Cla002630	SBP	transcription factor	IPR004333
Cla002630	SBP	transcription factor	IPR004333
XLOC_011618	SBP	transcription factor	IPR004333
Cla018546	SBP	transcription factor	IPR004333
Cla014559	STY-LRP1	transcription factor	IPR006510,IPR006511,IPR007818
Cla022450	STY-LRP1	transcription factor	IPR006510,IPR006511,IPR007818
Cla007368	STY-LRP1	transcription factor	IPR006510,IPR006511,IPR007818
Cla006939	TCP	transcription factor	IPR005333,IPR017887
Cla019117	TCP	transcription factor	IPR005333,IPR017887
Cla016274	TCP	transcription factor	IPR005333,IPR017887
Cla020050	TCP	transcription factor	IPR005333,IPR017887
Cla009096	TCP	transcription factor	IPR005333,IPR017887
Cla018622	TCP	transcription factor	IPR005333
Cla010176	TCP	transcription factor	IPR005333,IPR017887
Cla018445	TIFY	transcription factor	IPR010399
Cla020951	TIFY	transcription factor	IPR010399
Cla014216	TUBBY	transcription factor	IPR000007
Cla020929	WD40-like	transcription factor	IPR001680,IPR006594,IPR013720,IPR015943,IPR017986
Cla010012	WD40-like	transcription factor	IPR001680,IPR015943,IPR017986,IPR019775
Cla010606	WD40-like	transcription factor	IPR001680,IPR015943,IPR017986
Cla018903	WD40-like	transcription factor	IPR015943
Cla014666	WD40-like	transcription factor	IPR001680,IPR017986
Cla006020	WD40-like	transcription factor	IPR001680,IPR015943,IPR017986
Cla012663	WD40-like	transcription factor	IPR001680,IPR015943,IPR017986
Cla022529	WD40-like	transcription factor	IPR001680,IPR015943,IPR017986,IPR019775
Cla013914	WD40-like	transcription factor	IPR015943,IPR017986
Cla022627	WD40-like	transcription factor	IPR001680,IPR015943,IPR017986,IPR019775
Cla015198	WD40-like	transcription factor	IPR015943
Cla015187	WD40-like	transcription factor	IPR015943,IPR017986
Cla008942	WD40-like	transcription factor	IPR001680,IPR015943,IPR017986
Cla002890	WD40-like	transcription factor	IPR015943
Cla023134	WD40-like	transcription factor	IPR001680,IPR015943,IPR017986,IPR019775
Cla023384	WD40-like	transcription factor	IPR001680,IPR015943,IPR017986
Cla023384	WD40-like	transcription factor	IPR001680,IPR015943,IPR017986,IPR019775
Cla008447	WD40-like	transcription factor	IPR001680,IPR015943,IPR017986
Cla010432	WD40-like	transcription factor	IPR015943
Cla005157	WD40-like	transcription factor	IPR015943,IPR017986
Cla021356	WD40-like	transcription factor	IPR001680,IPR015943,IPR017986,IPR019775
Cla020848	WD40-like	transcription factor	IPR001680,IPR013083,IPR015943,IPR017986,IPR019775
Cla021750	WD40-like	transcription factor	IPR001680,IPR015943,IPR017986,IPR019775
Cla013035	WRKY	transcription factor	IPR003657
Cla002243	WRKY	transcription factor	IPR003657
Cla021984	WRKY	transcription factor	IPR003657
Cla013967	WRKY	transcription factor	IPR003657
Cla004431	WRKY	transcription factor	IPR003657
Cla017851	WRKY	transcription factor	IPR003657
Cla017851	WRKY	transcription factor	IPR003657
Cla018059	WRKY	transcription factor	IPR003657
Cla016540	WRKY	transcription factor	IPR003657
Cla007656	WRKY	transcription factor	IPR003657,IPR004827
Cla007761	WRKY	transcription factor	IPR003657
Cla013485	WRKY	transcription factor	IPR003657
Cla008480	WRKY	transcription factor	IPR003657
Cla009557	WRKY	transcription factor	IPR003657
Cla008104	WRKY	transcription factor	IPR003657
Cla018197	WRKY	transcription factor	IPR003657
Cla021806	WRKY	transcription factor	IPR003657
Cla014433	WRKY	transcription factor	IPR003657
Cla014117	ZF-HD	transcription factor	IPR006455,IPR009057
Cla001881	ZF-HD	transcription factor	IPR001356,IPR006455,IPR006456,IPR009057
Cla016175	Znf-LSD	transcription factor	IPR005735
